# Supplementary material for: Comprehensive analysis of morphology, transcriptomics, and metabolomics of banana (Musa spp.) molecular mechanisms related to plant height
Source: Front Plant Sci. 2025 Mar 25;16:1509193. doi: 10.3389/fpls.2025.1509193 (PMC11975952; doi:10.3389/fpls.2025.1509193)
Supplement: Supplementary file 10 [file Table7.xlsx]

## Sheet: Sheet1
Supplementary Table S7. Co-joint KEGG analysis. The list shows the pathways onto which the differetailly regulated genes and differentially accumulated metabolites were mapped.
#Kegg_pathway	ko_id	Gene_Cluter_frequency	Gene_Genome_frequency	Gene_P-value	Gene_rich_factor	Metabolite_Cluter_frequency	Metabolite_Genome_frequency	Metabolite_P-value	Metabolite_rich_factor
Plant hormone signal transduction	ko04075	140 out of 936 14.957264957265%	1098 out of 11720 9.36860068259386%	6.76759e-09	1.59653	3 out of 478 0.627615062761506%	8 out of 1577 0.507292327203551%	0.456214	1.23719
Cutin, suberine and wax biosynthesis	ko00073	15 out of 936 1.6025641025641%	75 out of 11720 0.639931740614334%	0.000740106	2.50427	5 out of 478 1.04602510460251%	21 out of 1577 1.33164235890932%	0.811751	0.785515
Phenylpropanoid biosynthesis	ko00940	42 out of 936 4.48717948717949%	322 out of 11720 2.74744027303754%	0.00104925	1.63322	11 out of 478 2.30125523012552%	34 out of 1577 2.15599239061509%	0.461353	1.06738
Amino sugar and nucleotide sugar metabolism	ko00520	37 out of 936 3.95299145299145%	299 out of 11720 2.55119453924915%	0.00496999	1.54947	11 out of 478 2.30125523012552%	22 out of 1577 1.39505389980977%	0.0405345	1.64958
alpha-Linolenic acid metabolism	ko00592	15 out of 936 1.6025641025641%	100 out of 11720 0.853242320819113%	0.01275	1.87821	11 out of 478 2.30125523012552%	30 out of 1577 1.90234622701332%	0.280712	1.20969
Pentose and glucuronate interconversions	ko00040	36 out of 936 3.84615384615385%	312 out of 11720 2.66211604095563%	0.0159254	1.44477	2 out of 478 0.418410041841004%	6 out of 1577 0.380469245402663%	0.586866	1.09972
Flavonoid biosynthesis	ko00941	16 out of 936 1.70940170940171%	114 out of 11720 0.972696245733788%	0.0187776	1.75738	10 out of 478 2.09205020920502%	31 out of 1577 1.96575776791376%	0.47367	1.06425
Stilbenoid, diarylheptanoid and gingerol biosynthesis	ko00945	8 out of 936 0.854700854700855%	51 out of 11720 0.435153583617747%	0.0476594	1.96414	3 out of 478 0.627615062761506%	14 out of 1577 0.887761572606214%	0.846284	0.706964
ABC transporters	ko02010	16 out of 936 1.70940170940171%	130 out of 11720 1.10921501706485%	0.054431	1.54109	21 out of 478 4.39330543933054%	48 out of 1577 3.04375396322131%	0.0315401	1.44338
Monoterpenoid biosynthesis	ko00902	4 out of 936 0.427350427350427%	19 out of 11720 0.162116040955631%	0.0597	2.63608	7 out of 478 1.46443514644351%	20 out of 1577 1.26823081800888%	0.403626	1.15471
Linoleic acid metabolism	ko00591	6 out of 936 0.641025641025641%	36 out of 11720 0.307167235494881%	0.0633638	2.08689	7 out of 478 1.46443514644351%	21 out of 1577 1.33164235890932%	0.462063	1.09972
Glucosinolate biosynthesis	ko00966	2 out of 936 0.213675213675214%	6 out of 11720 0.0511945392491468%	0.0770072	4.17379	14 out of 478 2.92887029288703%	37 out of 1577 2.34622701331642%	0.202095	1.24833
Benzoxazinoid biosynthesis	ko00402	1 out of 936 0.106837606837607%	1 out of 11720 0.00853242320819113%	0.0798635	12.5214	2 out of 478 0.418410041841004%	4 out of 1577 0.253646163601775%	0.353734	1.64958
Starch and sucrose metabolism	ko00500	42 out of 936 4.48717948717949%	425 out of 11720 3.62627986348123%	0.0870301	1.23741	6 out of 478 1.25523012552301%	10 out of 1577 0.634115409004439%	0.0491239	1.9795
Valine, leucine and isoleucine degradation	ko00280	13 out of 936 1.38888888888889%	110 out of 11720 0.938566552901024%	0.0990582	1.4798	4 out of 478 0.836820083682008%	6 out of 1577 0.380469245402663%	0.0725814	2.19944
Brassinosteroid biosynthesis	ko00905	5 out of 936 0.534188034188034%	32 out of 11720 0.273037542662116%	0.107615	1.95646	4 out of 478 0.836820083682008%	14 out of 1577 0.887761572606214%	0.65516	0.942618
Taurine and hypotaurine metabolism	ko00430	2 out of 936 0.213675213675214%	8 out of 11720 0.068259385665529%	0.129338	3.13034	2 out of 478 0.418410041841004%	4 out of 1577 0.253646163601775%	0.353734	1.64958
Zeatin biosynthesis	ko00908	8 out of 936 0.854700854700855%	65 out of 11720 0.554607508532423%	0.144878	1.54109	2 out of 478 0.418410041841004%	14 out of 1577 0.887761572606214%	0.955497	0.471309
Biosynthesis of unsaturated fatty acids	ko01040	5 out of 936 0.534188034188034%	37 out of 11720 0.315699658703072%	0.16949	1.69208	5 out of 478 1.04602510460251%	27 out of 1577 1.71211160431198%	0.946251	0.610956
Sulfur metabolism	ko00920	7 out of 936 0.747863247863248%	58 out of 11720 0.494880546075085%	0.177938	1.5112	1 out of 478 0.209205020920502%	4 out of 1577 0.253646163601775%	0.764525	0.824791
Cysteine and methionine metabolism	ko00270	19 out of 936 2.02991452991453%	190 out of 11720 1.62116040955631%	0.182542	1.25214	4 out of 478 0.836820083682008%	21 out of 1577 1.33164235890932%	0.920363	0.628412
Isoquinoline alkaloid biosynthesis	ko00950	6 out of 936 0.641025641025641%	50 out of 11720 0.426621160409556%	0.206669	1.50256	16 out of 478 3.34728033472803%	40 out of 1577 2.53646163601776%	0.120988	1.31967
Phenylalanine metabolism	ko00360	7 out of 936 0.747863247863248%	62 out of 11720 0.52901023890785%	0.22379	1.4137	10 out of 478 2.09205020920502%	18 out of 1577 1.14140773620799%	0.0219159	1.83287
Tyrosine metabolism	ko00350	8 out of 936 0.854700854700855%	75 out of 11720 0.639931740614334%	0.248138	1.33561	8 out of 478 1.67364016736402%	23 out of 1577 1.45846544071021%	0.394125	1.14754
Fatty acid biosynthesis	ko00061	8 out of 936 0.854700854700855%	76 out of 11720 0.648464163822526%	0.259602	1.31804	2 out of 478 0.418410041841004%	9 out of 1577 0.570703868103995%	0.810256	0.733147
Fatty acid metabolism	ko01212	11 out of 936 1.17521367521368%	113 out of 11720 0.964163822525597%	0.291302	1.21889	2 out of 478 0.418410041841004%	5 out of 1577 0.317057704502219%	0.478303	1.31967
Isoflavonoid biosynthesis	ko00943	3 out of 936 0.320512820512821%	24 out of 11720 0.204778156996587%	0.29963	1.56517	3 out of 478 0.627615062761506%	12 out of 1577 0.760938490805327%	0.755559	0.824791
Glycerophospholipid metabolism	ko00564	20 out of 936 2.13675213675214%	222 out of 11720 1.89419795221843%	0.319387	1.12805	5 out of 478 1.04602510460251%	7 out of 1577 0.443880786303107%	0.0298139	2.35655
Ubiquinone and other terpenoid-quinone biosynthesis	ko00130	8 out of 936 0.854700854700855%	82 out of 11720 0.699658703071672%	0.331203	1.2216	8 out of 478 1.67364016736402%	26 out of 1577 1.64870006341154%	0.554103	1.01513
Anthocyanin biosynthesis	ko00942	1 out of 936 0.106837606837607%	5 out of 11720 0.0426621160409556%	0.340478	2.50427	5 out of 478 1.04602510460251%	22 out of 1577 1.39505389980977%	0.844837	0.74981
Betalain biosynthesis	ko00965	4 out of 936 0.427350427350427%	37 out of 11720 0.315699658703072%	0.342069	1.35366	3 out of 478 0.627615062761506%	10 out of 1577 0.634115409004439%	0.626076	0.989749
Phenylalanine, tyrosine and tryptophan biosynthesis	ko00400	9 out of 936 0.961538461538462%	95 out of 11720 0.810580204778157%	0.347222	1.18623	9 out of 478 1.88284518828452%	20 out of 1577 1.26823081800888%	0.118079	1.48462
Steroid biosynthesis	ko00100	7 out of 936 0.747863247863248%	74 out of 11720 0.631399317406143%	0.378429	1.18445	7 out of 478 1.46443514644351%	26 out of 1577 1.64870006341154%	0.71714	0.888236
Fructose and mannose metabolism	ko00051	13 out of 936 1.38888888888889%	146 out of 11720 1.2457337883959%	0.383195	1.11492	3 out of 478 0.627615062761506%	7 out of 1577 0.443880786303107%	0.359859	1.41393
Valine, leucine and isoleucine biosynthesis	ko00290	3 out of 936 0.320512820512821%	28 out of 11720 0.238907849829352%	0.389563	1.34158	2 out of 478 0.418410041841004%	5 out of 1577 0.317057704502219%	0.478303	1.31967
Glutathione metabolism	ko00480	13 out of 936 1.38888888888889%	148 out of 11720 1.26279863481229%	0.402294	1.09985	2 out of 478 0.418410041841004%	16 out of 1577 1.0145846544071%	0.975887	0.412395
Glyoxylate and dicarboxylate metabolism	ko00630	13 out of 936 1.38888888888889%	150 out of 11720 1.27986348122867%	0.421448	1.08519	5 out of 478 1.04602510460251%	9 out of 1577 0.570703868103995%	0.102033	1.83287
Nitrogen metabolism	ko00910	5 out of 936 0.534188034188034%	54 out of 11720 0.460750853242321%	0.43457	1.15939	2 out of 478 0.418410041841004%	2 out of 1577 0.126823081800888%	0.0917399	3.29916
Flavone and flavonol biosynthesis	ko00944	4 out of 936 0.427350427350427%	42 out of 11720 0.358361774744027%	0.434922	1.19251	9 out of 478 1.88284518828452%	27 out of 1577 1.71211160431198%	0.436516	1.09972
Monobactam biosynthesis	ko00261	2 out of 936 0.213675213675214%	19 out of 11720 0.162116040955631%	0.455254	1.31804	8 out of 478 1.67364016736402%	21 out of 1577 1.33164235890932%	0.286752	1.25682
Vitamin B6 metabolism	ko00750	2 out of 936 0.213675213675214%	20 out of 11720 0.170648464163823%	0.482369	1.25214	5 out of 478 1.04602510460251%	11 out of 1577 0.697526949904883%	0.216505	1.49962
Biotin metabolism	ko00780	3 out of 936 0.320512820512821%	36 out of 11720 0.307167235494881%	0.557058	1.04345	2 out of 478 0.418410041841004%	6 out of 1577 0.380469245402663%	0.586866	1.09972
Carotenoid biosynthesis	ko00906	5 out of 936 0.534188034188034%	63 out of 11720 0.537542662116041%	0.572982	0.993759	13 out of 478 2.71966527196653%	57 out of 1577 3.6144578313253%	0.922729	0.752441
Ascorbate and aldarate metabolism	ko00053	9 out of 936 0.961538461538462%	119 out of 11720 1.01535836177474%	0.617326	0.946994	3 out of 478 0.627615062761506%	11 out of 1577 0.697526949904883%	0.69601	0.899772
Thiamine metabolism	ko00730	4 out of 936 0.427350427350427%	53 out of 11720 0.45221843003413%	0.620575	0.945009	3 out of 478 0.627615062761506%	7 out of 1577 0.443880786303107%	0.359859	1.41393
Diterpenoid biosynthesis	ko00904	4 out of 936 0.427350427350427%	54 out of 11720 0.460750853242321%	0.635456	0.927509	4 out of 478 0.836820083682008%	28 out of 1577 1.77552314521243%	0.986255	0.471309
Tropane, piperidine and pyridine alkaloid biosynthesis	ko00960	4 out of 936 0.427350427350427%	56 out of 11720 0.477815699658703%	0.664061	0.894383	11 out of 478 2.30125523012552%	29 out of 1577 1.83893468611287%	0.238867	1.25141
Nicotinate and nicotinamide metabolism	ko00760	4 out of 936 0.427350427350427%	57 out of 11720 0.486348122866894%	0.677777	0.878692	6 out of 478 1.25523012552301%	16 out of 1577 1.0145846544071%	0.35002	1.23719
Glycolysis / Gluconeogenesis	ko00010	19 out of 936 2.02991452991453%	265 out of 11720 2.26109215017065%	0.722728	0.897758	1 out of 478 0.209205020920502%	7 out of 1577 0.443880786303107%	0.920633	0.471309
Sulfur relay system	ko04122	1 out of 936 0.106837606837607%	16 out of 11720 0.136518771331058%	0.736215	0.782585	1 out of 478 0.209205020920502%	1 out of 1577 0.0634115409004439%	0.303107	3.29916
Purine metabolism	ko00230	14 out of 936 1.4957264957265%	201 out of 11720 1.71501706484642%	0.742145	0.872135	13 out of 478 2.71966527196653%	32 out of 1577 2.0291693088142%	0.138868	1.34029
Aminoacyl-tRNA biosynthesis	ko00970	10 out of 936 1.06837606837607%	147 out of 11720 1.2542662116041%	0.746377	0.851794	8 out of 478 1.67364016736402%	16 out of 1577 1.0145846544071%	0.0774088	1.64958
Sphingolipid metabolism	ko00600	11 out of 936 1.17521367521368%	165 out of 11720 1.40784982935154%	0.775973	0.834758	6 out of 478 1.25523012552301%	12 out of 1577 0.760938490805327%	0.121974	1.64958
Mannose type O-glycan biosynthesis	ko00515	2 out of 936 0.213675213675214%	36 out of 11720 0.307167235494881%	0.794361	0.695632	1 out of 478 0.209205020920502%	1 out of 1577 0.0634115409004439%	0.303107	3.29916
Biosynthesis of amino acids	ko01230	32 out of 936 3.41880341880342%	459 out of 11720 3.91638225255973%	0.816543	0.872949	22 out of 478 4.60251046025105%	46 out of 1577 2.91693088142042%	0.00848238	1.57786
Histidine metabolism	ko00340	2 out of 936 0.213675213675214%	38 out of 11720 0.324232081911263%	0.818635	0.659019	8 out of 478 1.67364016736402%	16 out of 1577 1.0145846544071%	0.0774088	1.64958
Glycine, serine and threonine metabolism	ko00260	8 out of 936 0.854700854700855%	134 out of 11720 1.14334470989761%	0.84891	0.747544	7 out of 478 1.46443514644351%	15 out of 1577 0.951173113506658%	0.136015	1.53961
Folate biosynthesis	ko00790	2 out of 936 0.213675213675214%	41 out of 11720 0.349829351535836%	0.850241	0.610798	5 out of 478 1.04602510460251%	20 out of 1577 1.26823081800888%	0.77327	0.824791
Galactose metabolism	ko00052	12 out of 936 1.28205128205128%	193 out of 11720 1.64675767918089%	0.854045	0.778531	1 out of 478 0.209205020920502%	5 out of 1577 0.317057704502219%	0.836081	0.659833
Butanoate metabolism	ko00650	2 out of 936 0.213675213675214%	42 out of 11720 0.358361774744027%	0.859608	0.596256	2 out of 478 0.418410041841004%	4 out of 1577 0.253646163601775%	0.353734	1.64958
Terpenoid backbone biosynthesis	ko00900	4 out of 936 0.427350427350427%	76 out of 11720 0.648464163822526%	0.866549	0.659019	2 out of 478 0.418410041841004%	8 out of 1577 0.507292327203551%	0.751486	0.824791
Arachidonic acid metabolism	ko00590	2 out of 936 0.213675213675214%	43 out of 11720 0.366894197952218%	0.868436	0.582389	8 out of 478 1.67364016736402%	30 out of 1577 1.90234622701332%	0.733145	0.879777
Tryptophan metabolism	ko00380	5 out of 936 0.534188034188034%	94 out of 11720 0.802047781569966%	0.879857	0.66603	12 out of 478 2.51046025104602%	30 out of 1577 1.90234622701332%	0.166589	1.31967
Lysine biosynthesis	ko00300	1 out of 936 0.106837606837607%	26 out of 11720 0.221843003412969%	0.885419	0.481591	4 out of 478 0.836820083682008%	11 out of 1577 0.697526949904883%	0.439585	1.1997
Pyruvate metabolism	ko00620	9 out of 936 0.961538461538462%	157 out of 11720 1.33959044368601%	0.888874	0.717785	1 out of 478 0.209205020920502%	6 out of 1577 0.380469245402663%	0.885924	0.549861
Riboflavin metabolism	ko00740	2 out of 936 0.213675213675214%	46 out of 11720 0.392491467576792%	0.891945	0.544407	1 out of 478 0.209205020920502%	9 out of 1577 0.570703868103995%	0.961615	0.366574
Alanine, aspartate and glutamate metabolism	ko00250	4 out of 936 0.427350427350427%	81 out of 11720 0.691126279863481%	0.896665	0.618339	5 out of 478 1.04602510460251%	10 out of 1577 0.634115409004439%	0.154941	1.64958
Lysine degradation	ko00310	3 out of 936 0.320512820512821%	66 out of 11720 0.563139931740614%	0.906473	0.569153	6 out of 478 1.25523012552301%	9 out of 1577 0.570703868103995%	0.0262692	2.19944
Pantothenate and CoA biosynthesis	ko00770	3 out of 936 0.320512820512821%	66 out of 11720 0.563139931740614%	0.906473	0.569153	4 out of 478 0.836820083682008%	12 out of 1577 0.760938490805327%	0.517364	1.09972
Cyanoamino acid metabolism	ko00460	4 out of 936 0.427350427350427%	83 out of 11720 0.708191126279863%	0.90693	0.603439	6 out of 478 1.25523012552301%	16 out of 1577 1.0145846544071%	0.35002	1.23719
Arginine and proline metabolism	ko00330	4 out of 936 0.427350427350427%	95 out of 11720 0.810580204778157%	0.951541	0.527215	13 out of 478 2.71966527196653%	32 out of 1577 2.0291693088142%	0.138868	1.34029
Citrate cycle (TCA cycle)	ko00020	4 out of 936 0.427350427350427%	97 out of 11720 0.827645051194539%	0.956699	0.516345	1 out of 478 0.209205020920502%	3 out of 1577 0.190234622701332%	0.661828	1.09972
Inositol phosphate metabolism	ko00562	10 out of 936 1.06837606837607%	198 out of 11720 1.68941979522184%	0.960042	0.632392	2 out of 478 0.418410041841004%	5 out of 1577 0.317057704502219%	0.478303	1.31967
Pyrimidine metabolism	ko00240	6 out of 936 0.641025641025641%	140 out of 11720 1.19453924914676%	0.971958	0.53663	9 out of 478 1.88284518828452%	32 out of 1577 2.0291693088142%	0.67196	0.92789
Carbon metabolism	ko01200	29 out of 936 3.0982905982906%	494 out of 11720 4.21501706484642%	0.972558	0.73506	7 out of 478 1.46443514644351%	24 out of 1577 1.52187698161065%	0.625351	0.962256
2-Oxocarboxylic acid metabolism	ko01210	2 out of 936 0.213675213675214%	72 out of 11720 0.614334470989761%	0.98214	0.347816	22 out of 478 4.60251046025105%	54 out of 1577 3.42422320862397%	0.0635416	1.3441
Porphyrin and chlorophyll metabolism	ko00860	2 out of 936 0.213675213675214%	72 out of 11720 0.614334470989761%	0.98214	0.347816	9 out of 478 1.88284518828452%	31 out of 1577 1.96575776791376%	0.629486	0.957822
Phosphatidylinositol signaling system	ko04070	9 out of 936 0.961538461538462%	202 out of 11720 1.72354948805461%	0.98378	0.557883	1 out of 478 0.209205020920502%	2 out of 1577 0.126823081800888%	0.514474	1.64958
Pentose phosphate pathway	ko00030	4 out of 936 0.427350427350427%	115 out of 11720 0.98122866894198%	0.984903	0.435526	1 out of 478 0.209205020920502%	7 out of 1577 0.443880786303107%	0.920633	0.471309
Arginine biosynthesis	ko00220	1 out of 936 0.106837606837607%	54 out of 11720 0.460750853242321%	0.988949	0.231877	5 out of 478 1.04602510460251%	9 out of 1577 0.570703868103995%	0.102033	1.83287
Propanoate metabolism	ko00640	1 out of 936 0.106837606837607%	54 out of 11720 0.460750853242321%	0.988949	0.231877	2 out of 478 0.418410041841004%	5 out of 1577 0.317057704502219%	0.478303	1.31967
Photosynthesis	ko00195	3 out of 936 0.320512820512821%	116 out of 11720 0.989761092150171%	0.996191	0.323828	2 out of 478 0.418410041841004%	4 out of 1577 0.253646163601775%	0.353734	1.64958
Sesquiterpenoid and triterpenoid biosynthesis	ko00909	1 out of 936 0.106837606837607%	68 out of 11720 0.580204778156997%	0.996575	0.184138	2 out of 478 0.418410041841004%	11 out of 1577 0.697526949904883%	0.891921	0.599848
Oxidative phosphorylation	ko00190	10 out of 936 1.06837606837607%	258 out of 11720 2.20136518771331%	0.997597	0.485324	1 out of 478 0.209205020920502%	2 out of 1577 0.126823081800888%	0.514474	1.64958
